# Supplementary material for: Expression of FAD and SAD Genes in Developing Seeds of Flax Varieties under Different Growth Conditions
Source: MDPI journal article supplement (doi:10.3390/plants13070956), 2024-03-26
Supplement: s1 [file s1]

AGT 427

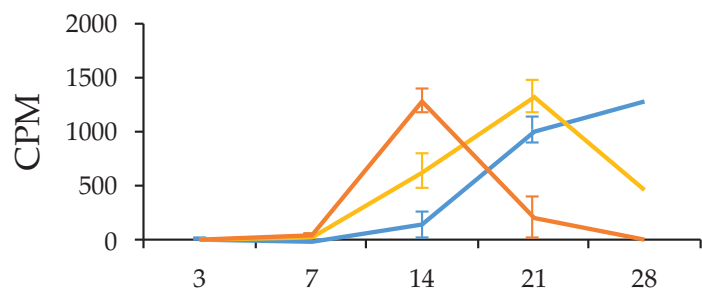

Raciol

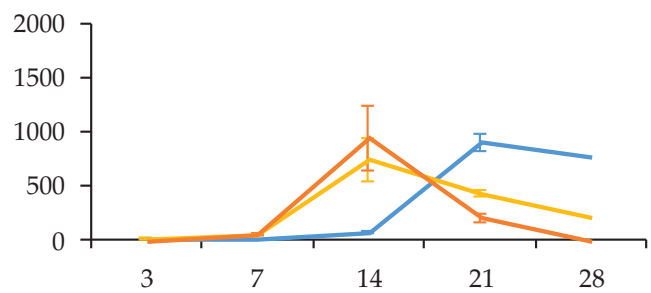

Atalante

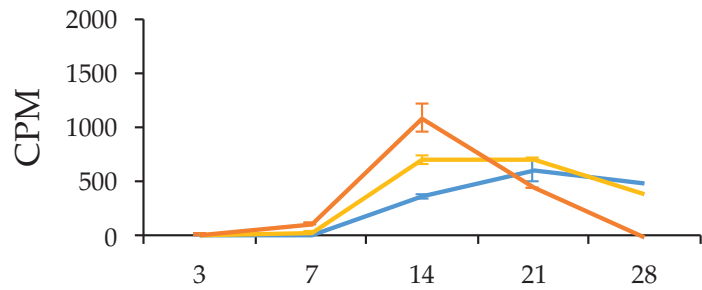

AGT 422

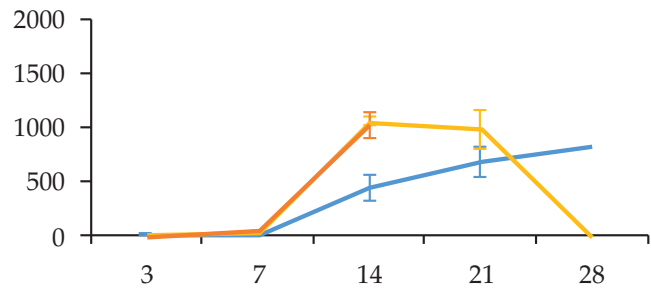

Entre-Rios

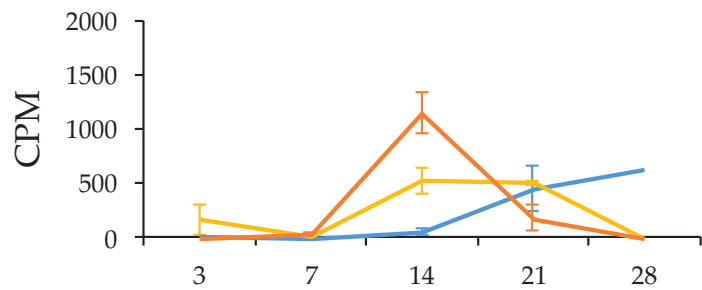

AGT 981

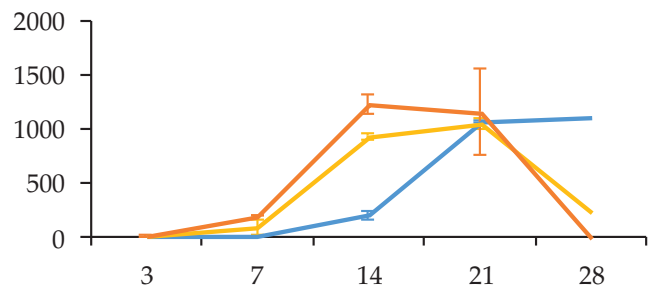

Norlin

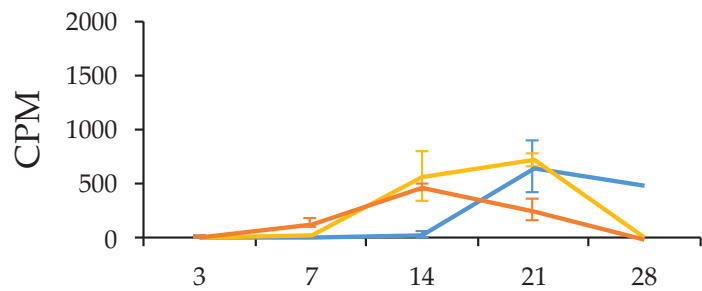

AGT 1535

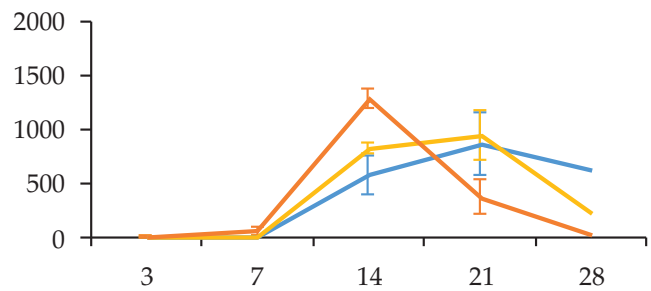

Pechersky kryazh

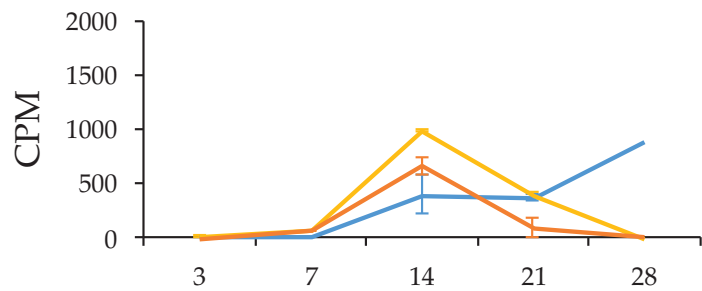

Lola

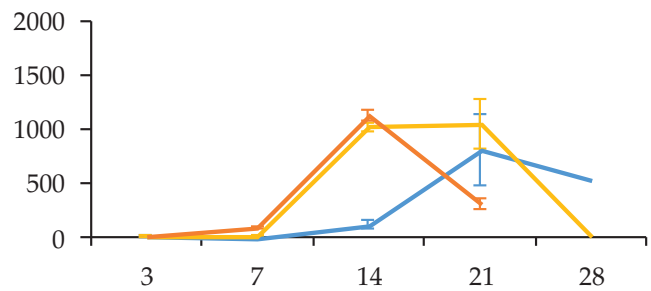

DAF

DAF

— 16 °C

— 20 °C

— 24 °C

**Figure S3.** Expression profiles (3, 7, 14, 21, and 28 DAF) of *FAD2a-2* gene in high-LIN (AGT 427, Atalante, Entre-Rios, Norlin, and Pechersky kryazh), mid-LIN (Raciol and AGT 422), and low-LIN (AGT 981, AGT 1535, and Lola) flax varieties grown at 16 °C and overwatered (16 °C), at 20 °C and optimally watered (20 °C), and at 24 °C and underwatered (24 °C). Data are missing for 21 and 28 DAF at 24 °C for AGT 422 and 28 DAF at 24 °C for Lola. Error bars represent values obtained for two biological replicates.
